# Supplementary material for: Effectiveness and safety of steamed ginger extract on mild osteoarthritis: a randomized, double-blind, placebo-controlled clinical trial
Source: Royal Society of Chemistry journal article supplement (doi:10.1039/d4fo01640h), 2024-01-01
Supplement: d4fo01640h1.pdf [file d4fo01640h1.pdf]

**Supplemental Table S1** Changes in pain VAS and K-WOMAC before and after 12weeks of intake (PP analysis).

|               | GGE03 group (n=49) |              |               |                              | Placebo group (n=45) |              |              |                              | <i>p</i> -value <sup>b</sup> |
|---------------|--------------------|--------------|---------------|------------------------------|----------------------|--------------|--------------|------------------------------|------------------------------|
|               | Baseline           | 12 week      | Change value  | <i>p</i> -value <sup>a</sup> | Baseline             | 12 week      | Change value | <i>p</i> -value <sup>a</sup> |                              |
| Pain VAS (mm) | 44.18 ± 5.53       | 28.98 ± 6.45 | -15.20 ± 5.86 | <.0001                       | 42.39 ± 5.65         | 39.13 ± 6.52 | -3.26 ± 5.60 | 0.0003                       | <.0001*<br>**                |
| K-WOMAC       |                    |              |               |                              |                      |              |              |                              |                              |
| Total score   | 15.73 ± 5.96       | 5.73 ± 3.17  | -10.00 ± 5.24 | <.0001**<br>*                | 13.78 ± 5.31         | 11.13 ± 4.06 | -2.65 ± 5.51 | 0.002**                      | <.0001*<br>**                |
| Pain          | 3.84 ± 1.82        | 0.80 ± 0.82  | -3.04 ± 1.81  | <.0001**<br>*                | 3.63 ± 1.78          | 2.52 ± 1.35  | -1.11 ± 1.79 | 0.0001*<br>**                | <.0001*<br>**                |
| Stiffness     | 2.20 ± 0.61        | 0.84 ± 0.66  | -1.37 ± 0.83  | <.0001**<br>*                | 1.98 ± 0.61          | 1.78 ± 0.66  | -0.20 ± 0.65 | 0.048*                       | <.0001*<br>**                |
| Function      | 9.69 ± 4.42        | 4.10 ± 2.19  | -5.59 ± 3.65  | <.0001**<br>*                | 8.17 ± 3.67          | 6.83 ± 2.61  | -1.35 ± 3.52 | 0.013*                       | <.0001*<br>**                |

Values are presented as mean ± SD. <sup>a</sup>Analyzed by paired t-test between baseline and 12 weeks within each group. <sup>b</sup>Analyzed by independent t-test for change value between the groups. \**p*<0.05, \*\**p*<0.01, \*\*\**p*<0.001.

**Supplemental Table S2** Changes in pain VAS and K-WOMAC before and after 12weeks of intake (ITT analysis)

|               | GGE03 group (n=50) |              |               |                              | Placebo group (n=50) |              |              |                              | <i>p</i> -value <sup>b</sup> |
|---------------|--------------------|--------------|---------------|------------------------------|----------------------|--------------|--------------|------------------------------|------------------------------|
|               | Baseline           | 12 week      | Change value  | <i>p</i> -value <sup>a</sup> | Baseline             | 12 week      | Change value | <i>p</i> -value <sup>a</sup> |                              |
| Pain VAS (mm) | 44.10 ± 5.50       | 29.20 ± 6.57 | -14.90 ± 6.19 | <.0001                       | 42.60 ± 5.55         | 39.60 ± 6.53 | -3.00 ± 5.44 | 0.0003                       | <.0001*<br>**                |
| K-WOMAC       |                    |              |               |                              |                      |              |              |                              |                              |
| Total score   | 15.74 ± 5.90       | 5.94 ± 3.46  | -9.80 ± 5.37  | <.0001**<br>*                | 13.66 ± 5.12         | 11.16 ± 3.92 | -2.50 ± 5.32 | 0.002**                      | <.0001*<br>**                |
| Pain          | 3.86 ± 1.81        | 0.88 ± 1.00  | -2.98 ± 1.85  | <.0001**<br>*                | 3.56 ± 1.73          | 2.52 ± 1.30  | -1.04 ± 1.74 | 0.0001*<br>**                | <.0001*<br>**                |
| Stiffness     | 2.20 ± 0.61        | 0.86 ± 0.67  | -1.34 ± 0.85  | <.0001**<br>*                | 1.98 ± 0.59          | 1.80 ± 0.64  | -0.18 ± 0.63 | 0.049*                       | <.0001*<br>**                |
| Function      | 9.68 ± 4.37        | 4.20 ± 2.28  | -5.48 ± 3.70  | <.0001**<br>*                | 8.12 ± 3.53          | 6.84 ± 2.53  | -1.28 ± 3.39 | 0.010*                       | <.0001*<br>**                |

Values are presented as mean ± SD. <sup>a</sup>Analyzed by paired t-test between baseline and 12 weeks within each group. <sup>b</sup>Analyzed by independent t-test for change value between the groups. \**p*<0.05, \*\**p*<0.01, \*\*\**p*<0.001.

**Supplemental Table S3** Laboratory profiles before and after 12weeks of intake

|                                   | GGE03 group (n=50) |                |               |                              | Placebo group (n=50) |                 |                |                              | <i>p</i> -value <sup>b</sup> |
|-----------------------------------|--------------------|----------------|---------------|------------------------------|----------------------|-----------------|----------------|------------------------------|------------------------------|
|                                   | Baseline           | 12 week        | Change value  | <i>p</i> -value <sup>a</sup> | Baseline             | 12 week         | Change value   | <i>p</i> -value <sup>a</sup> |                              |
| <b>Complete Blood Count (CBC)</b> |                    |                |               |                              |                      |                 |                |                              |                              |
| Hemoglobin (g/dL)                 | 13.77 ± 0.86       | 13.72 ± 0.88   | -0.05 ± 0.48  | 0.486                        | 13.97 ± 1.32         | 14.09 ± 1.47    | 0.11 ± 0.46    | 0.090                        | 0.092                        |
| Hematocrit (%)                    | 40.82 ± 2.66       | 41.18 ± 2.76   | 0.36 ± 1.97   | 0.203                        | 41.45 ± 3.91         | 42.34 ± 4.64    | 0.89 ± 1.84    | 0.001**                      | 0.168                        |
| WBC (K/UL)                        | 5.34 ± 1.34        | 5.42 ± 1.50    | 0.08 ± 1.14   | 0.614                        | 5.37 ± 1.07          | 5.68 ± 1.44     | 0.31 ± 1.29    | 0.100                        | 0.358                        |
| RBC (M/UL)                        | 4.39 ± 0.30        | 4.39 ± 0.31    | 0.00 ± 0.19   | 0.971                        | 4.45 ± 0.38          | 4.50 ± 0.45     | 0.05 ± 0.18    | 0.072                        | 0.217                        |
| Platelet (K/UL)                   | 237.98 ± 62.75     | 241.10 ± 65.80 | 3.12 ± 36.74  | 0.551                        | 238.00 ± 45.91       | 247.30 ± 56.10  | 9.30 ± 50.07   | 0.195                        | 0.483                        |
| <b>Biochemistry</b>               |                    |                |               |                              |                      |                 |                |                              |                              |
| AST (U/L)                         | 26.54 ± 7.35       | 27.62 ± 10.76  | 1.08 ± 9.13   | 0.407                        | 25.10 ± 8.05         | 28.42 ± 15.11   | 3.32 ± 13.11   | 0.080                        | 0.324                        |
| ALT (U/L)                         | 23.84 ± 9.71       | 25.70 ± 15.72  | 1.86 ± 14.08  | 0.355                        | 23.04 ± 10.76        | 23.48 ± 12.12   | 0.44 ± 9.70    | 0.750                        | 0.559                        |
| gamma-GT (U/L)                    | 21.44 ± 16.40      | 21.42 ± 14.55  | -0.02 ± 7.42  | 0.985                        | 25.04 ± 22.60        | 25.68 ± 22.13   | 0.64 ± 10.09   | 0.656                        | 0.710                        |
| Total cholesterol (mg/dL)         | 206.58 ± 46.14     | 215.78 ± 44.77 | 9.20 ± 43.93  | 0.145                        | 202.56 ± 36.59       | 205.32 ± 38.03  | 2.76 ± 25.65   | 0.450                        | 0.373                        |
| LDL-C (mg/dL)                     | 126.04 ± 37.93     | 127.20 ± 38.33 | 1.16 ± 30.06  | 0.786                        | 124.24 ± 33.68       | 120.62 ± 30.49  | -3.62 ± 23.74  | 0.286                        | 0.380                        |
| HDL-C (mg/dL)                     | 53.62 ± 11.58      | 57.60 ± 9.75   | 3.98 ± 9.76   | 0.006**                      | 52.60 ± 12.25        | 56.70 ± 14.68   | 4.10 ± 8.44    | 0.001**                      | 0.948                        |
| Albumin (g/dL)                    | 4.31 ± 0.35        | 4.42 ± 0.29    | 0.11 ± 0.39   | 0.051                        | 4.32 ± 0.28          | 4.39 ± 0.29     | 0.08 ± 0.34    | 0.123                        | 0.643                        |
| Total protein (g/dL)              | 7.34 ± 0.49        | 7.53 ± 0.47    | 0.19 ± 0.66   | 0.042*                       | 7.35 ± 0.39          | 7.50 ± 0.44     | 0.15 ± 0.46    | 0.023*                       | 0.711                        |
| Total bilirubin (mg/dL)           | 0.98 ± 0.25        | 0.98 ± 0.25    | 0.00 ± 0.22   | 0.948                        | 0.88 ± 0.24          | 0.96 ± 0.25     | 0.08 ± 0.21    | 0.012*                       | 0.078                        |
| ALP (U/L)                         | 62.52 ± 13.83      | 64.44 ± 17.69  | 1.92 ± 14.04  | 0.338                        | 66.30 ± 20.42        | 70.04 ± 20.87   | 3.74 ± 12.81   | 0.044*                       | 0.500                        |
| LD (U/L)                          | 166.54 ± 30.58     | 174.06 ± 29.81 | 7.52 ± 32.20  | 0.105                        | 160.36 ± 30.14       | 174.50 ± 35.44  | 14.14 ± 33.16  | 0.004**                      | 0.314                        |
| Glucose (mg/dL)                   | 103.98 ± 11.49     | 106.08 ± 12.31 | 2.10 ± 10.29  | 0.155                        | 103.48 ± 9.40        | 106.28 ± 10.42  | 2.80 ± 9.96    | 0.053                        | 0.730                        |
| BUN (mg/dL)                       | 14.93 ± 4.25       | 15.04 ± 3.24   | 0.11 ± 3.59   | 0.829                        | 15.08 ± 3.64         | 14.92 ± 3.05    | -0.16 ± 3.67   | 0.756                        | 0.709                        |
| Triglyceride (mg/dL)              | 118.52 ± 51.89     | 130.46 ± 56.83 | 11.94 ± 56.73 | 0.143                        | 134.20 ± 74.94       | 124.64 ± 65.32  | -9.56 ± 52.80  | 0.207                        | 0.053                        |
| Creatinine (mg/dL)                | 0.85 ± 0.20        | 0.87 ± 0.19    | 0.01 ± 0.09   | 0.374                        | 0.85 ± 0.17          | 0.86 ± 0.17     | 0.01 ± 0.13    | 0.576                        | 0.971                        |
| CK (U/L)                          | 113.12 ± 49.52     | 130.10 ± 96.26 | 16.98 ± 82.68 | 0.153                        | 102.04 ± 45.03       | 151.68 ± 293.41 | 49.64 ± 289.24 | 0.231                        | 0.446                        |
| <b>Urinalysis</b>                 |                    |                |               |                              |                      |                 |                |                              |                              |
| pH                                | 6.38 ± 1.00        | 6.36 ± 0.89    | -0.02 ± 1.11  | 0.899                        | 6.54 ± 0.96          | 6.51 ± 0.90     | -0.03 ± 1.07   | 0.843                        | 0.964                        |
| Specific gravity                  | 1.02 ± 0.01        | 1.02 ± 0.01    | 0.00 ± 0.01   | 0.425                        | 1.02 ± 0.01          | 1.02 ± 0.01     | 0.00 ± 0.01    | 0.390                        | 0.240                        |

Values are presented as mean ± SD. <sup>a</sup>Analyzed by paired t-test between baseline and 12 weeks within each group. <sup>b</sup>Analyzed by independent t-test for change value between the groups. \**p*<0.05, \*\**p*<0.01
